# Supplementary material for: Aeroelastic response of a multi-megawatt upwind HAWT based on fluid-structure interaction simulation
Source: Copernicus journal article supplement (doi:10.5194/wes-2019-29), 2019-06-26
Supplement: Supplementary file [file wes-2019-29-AC2-supplement.pdf]

Response to Referee #2:

[Authors] page 6 line 24 remove: "As the clearance between"

[Authors] Thanks! Will be corrected in the final version.

[Authors] figure 14 remove (CFD) from yaxis

[Authors] To reduce the gap between the CFD and the BEM blades flapwise deformations curves, the deflection of the BEM blades have been shifted to the bottom, therefore we are showing results of the two different methods on two y-axes. They are needed to indicate which axis represent the results for which method.

[Authors] capter :3.2.2 the reason why the tower shadow effect in the BEM is much higher compared to the CFD model should be described in detail.

[Authors] For the current simulation conditions, BEM predicted higher rotor thrust and torque than the CFD model. The blade structure behaves like a spring, the more you compress it the more the displacement amplitude will be. Therefore the displacement amplitude of the BEM blade is bigger than the CFD model as it passes in the tower shadow. (This paragraph will be added to the last version of the manuscript).
