# Supplementary material for: Aeroelastic response of a multi-megawatt upwind HAWT based on fluid-structure interaction simulation
Source: Copernicus journal article supplement (doi:10.5194/wes-2019-29), 2019-06-26
Supplement: Supplementary file [file wes-2019-29-SC1-supplement.pdf]

The paper deals with a very important and interesting topic in wind energy. However, there are some issues that need to be solved before the final publication.

1. The level of English language is poor and makes portions of the paper incomprehensible.
  - a. Please do not use more than one verb per sentence (for example is occur, is depend)
  - b. It either is "to depend on" or "to be dependent on"; never is depend
  - c. Blades domain / blades deflection → blade domain/ blade domain
  - d. Wind turbines rotor → wind turbine rotor
  - e. What is pass's? Do you mean passes?
  - f. What is "Maximum tower side/flow direction deflection"?

Please also add the missing "the" and missing prepositions.

2. cm is no good measurement unit. Please use m ( $10^{-2}$ m) instead.
3. Section 1: I missed the point on what is new in the present paper with respect to your previous publications, Could you please clarify?
4. I did not get the inflow conditions. Is it constant in height? Logarithmic law? Exponential law? Constant in time? Do you use veer? Please clarify.
5. Could you please provide the convergence histories of the blade and tower deflection over time? (Deflection over cycle number)
6. Would it be possible to add a table with the results of section 3.2.2 included?
7. In section 2 you mention that "modelling a complete aeroelastic wind turbine poses a huge number of challenges" but you name only one afterwards. Is it one or more than one?
8. Why did you choose the flow domain to be so small? They are usually ten times larger in each direction comprising more points.
9. Could you give more details on the grid? What is the resolution on the blade surface, of your boundary layer grid, boundary conditions on the blades and tower?
